# Supplementary material for: Soil Hydrology Process and Sustainable Use of Soil Water Resources in Desert Regions
Source: Preprints.org preprint supplement (doi:10.20944/preprints202106.0159.v1), 2021-06-07
Supplement: Supplementary file 1 [file supplementary]

Table 1 Slope and canopy projection area of Caragana korshinkii at different planting densities

(shrubs 100 m2)

| planting density | 87 | 71 | 51 | 32 | 16 |
| --- | --- | --- | --- | --- | --- |
| Slope gradient (°) | 7.9 | 7.8 | 8.5 | 7.7 | 7 |
| Projection area (m2) | 99.2 | 99.1 | 99.1 | 99.3 | 99.4 |
